# Supplementary material for: Phosphotungstic acid supported on aminosilica functionalized perovskite-type LaFeO3nanoparticles: a novel recyclable and excellent visible-light photocatalyst
Source: Royal Society of Chemistry journal article supplement (doi:10.1039/c6ra24627c), 2016-01-01
Supplement: c6ra24627c1.pdf [file c6ra24627c1.pdf]

## Supporting Information

### **Phosphotungstic acid supported on aminosilica functionalized perovskite-type $\text{LaFeO}_3$ nanoparticles: a novel recyclable and excellent visible-light photocatalyst**

Saeed Farhadi<sup>a\*</sup>, Mostafa M. Amini<sup>b</sup>, Farzaneh Mahmoudi<sup>a</sup>

<sup>a</sup>*Department of Chemistry, Lorestan University, Khoramabad 68151-44316, Iran*

<sup>b</sup>*Department of Chemistry, Shahid Beheshti University, Tehran 1983963113, Iran*

\*Corresponding author at:

Department of Chemistry, Lorestan University, Khoramabad 68151-44316, Iran.

Tel: +98 06633120611, fax: +98 06633120618

E-mail address: sfarhadi1348@yahoo.com (Saeed Farhadi)

## **Supplementary Index**

### **Tables:**

1. The structure and nature of methylene blue and methyl orange dye pollutants (S1)

### **Figures:**

1. Time dependent absorption spectrum during photocatalytic reaction of MB (a) and MO (b) in the presence of LaFeO<sub>3</sub> nanoparticles (concentration of MB and MO= 25 mg/L, amount of catalyst = 20 mg, 2 mL of hydrogen peroxide 0.1 M, reaction temperature =25°C) ( S1)
2. Time dependent absorption spectrum during photocatalytic reaction of MB (a) and MO (b) in the presence of PTA (concentration of MB and MO= 25 mg/L, amount of catalyst = 10 mg, 2 mL of hydrogen peroxide 0.1 M, reaction temperature =25°C) (S2)
3. Effect of different amounts of hydrogen peroxide on the photocatalytic degradation of MB in the presence of composite catalyst. concentration of MB= 25mg/L, amount of catalyst = 25 mg, amount of hydrogen peroxide addition, 1 mL (sample 1), 2mL (sample 2), 3 mL (sample 3), reaction temperature =25°C) (S3)
4. The FT-IR spectra of recovered catalyst after three cycles of photodegradation reactions ( S4)

**Table S1.** The structure and nature of methylene blue and methyl orange dye pollutants

| Dye name               | Chemical Structure                                                                | Ionicity | Size (nm <sup>3</sup> ) | MW(g/mol) | Absorption<br>$\lambda$ max(nm) |
|------------------------|-----------------------------------------------------------------------------------|----------|-------------------------|-----------|---------------------------------|
| Methylene Blue<br>(MB) | 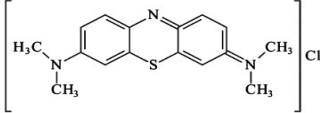 | Cationic | 1.38 0.64 0.21          | 319.85    | 664                             |
| Methyl Orange<br>(MO)  | 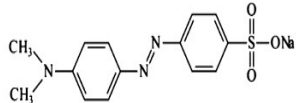 | Anionic  | 1.54 0.48 0.28          | 327.33    | 463                             |

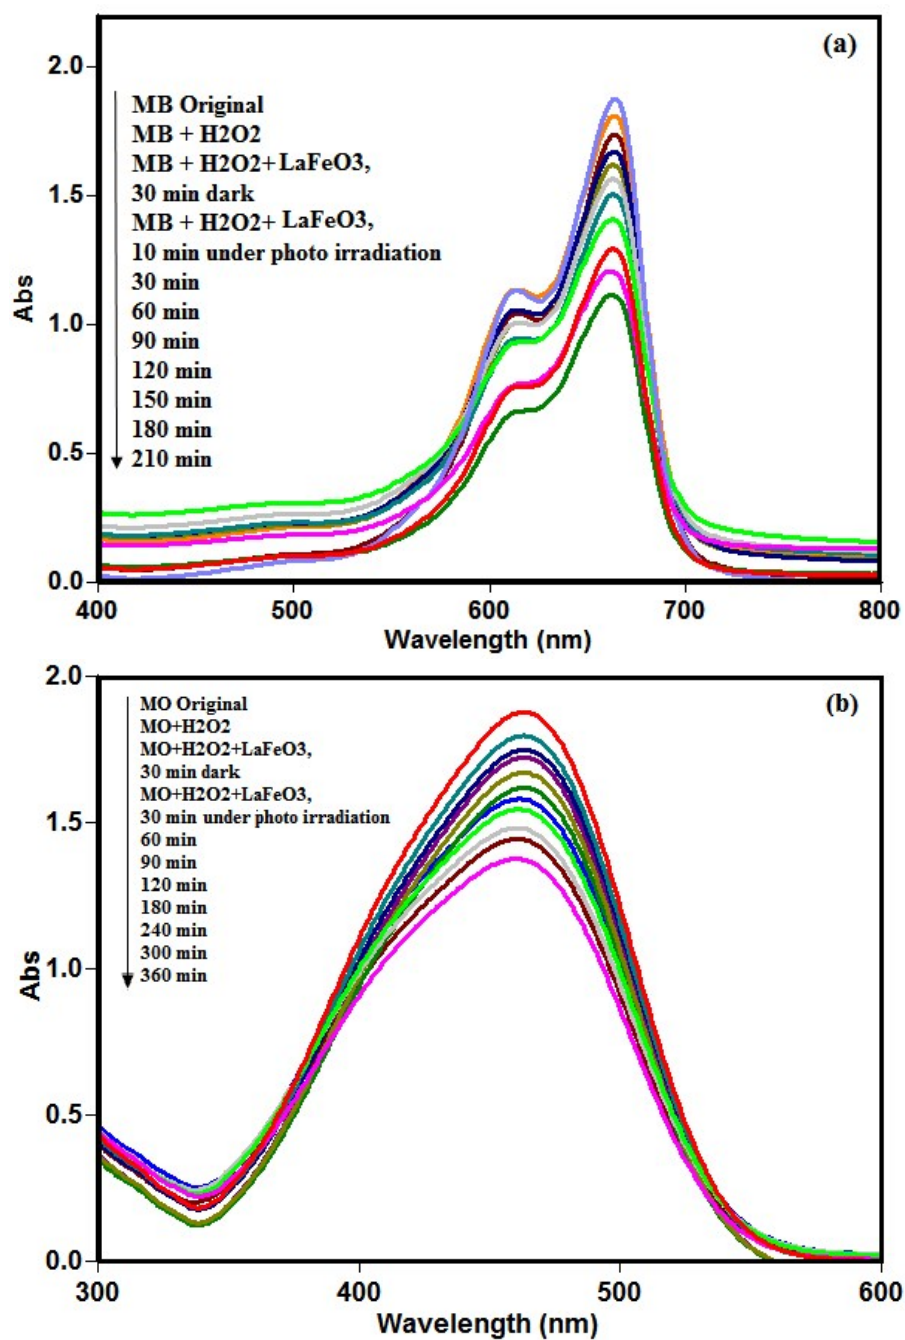

**Fig. S1.** UV-Vis time dependent absorption spectrum during photocatalytic reaction of MB (a) and MO (b) in the presence of LaFeO<sub>3</sub> nanoparticles (concentration of MB and MO= 25 mg/L, amount of catalyst = 20 mg, 2 mL of hydrogen peroxide 0.1 M, reaction temperature =32°C).

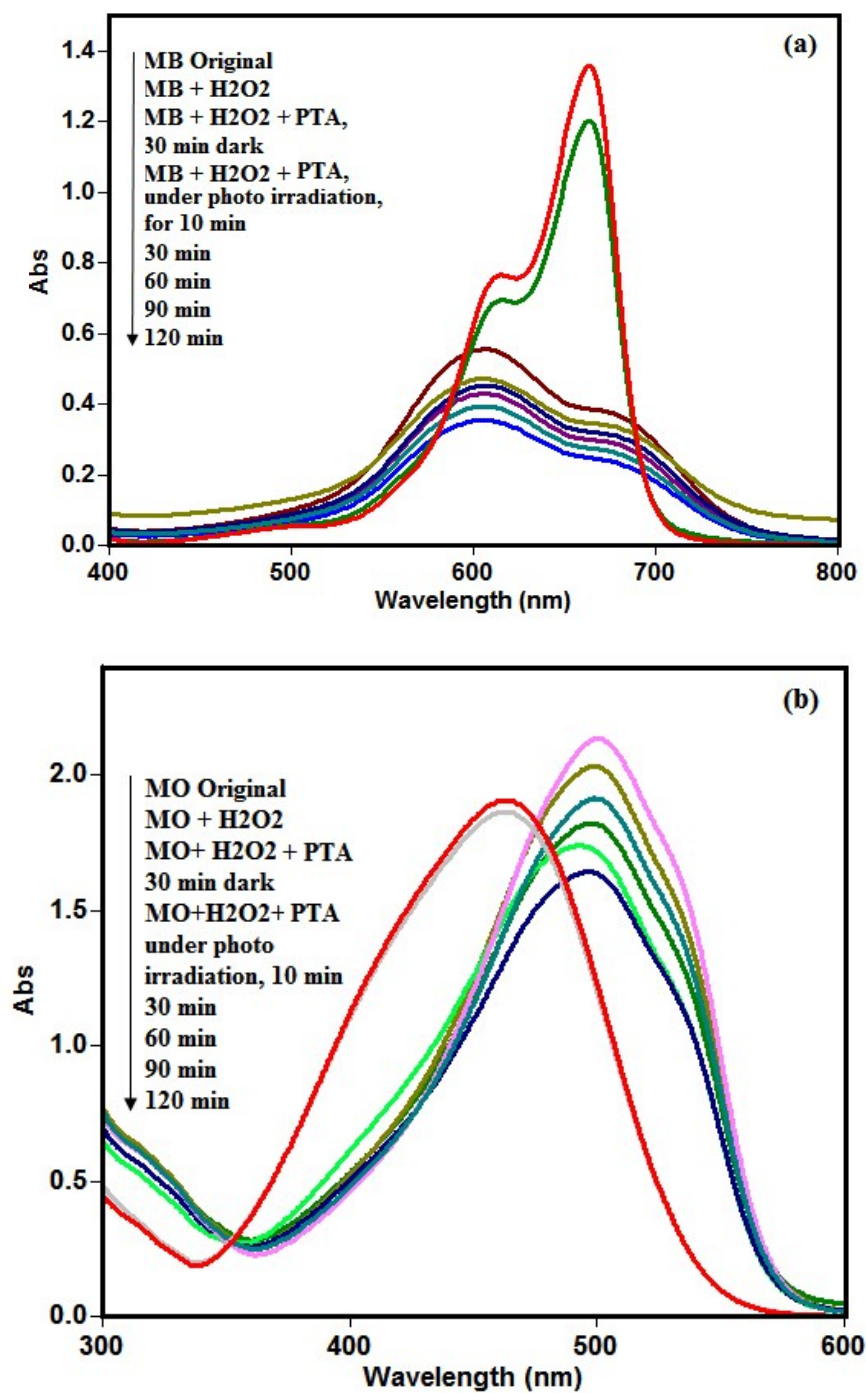

**Fig. S2.** UV-Vis time dependent absorption spectrum during photocatalytic reaction of MB (a) and MO (b) in the presence of PTA (concentration of MB and MO= 25 mg/L, amount of catalyst = 10 mg, 2 mL of hydrogen peroxide 0.1 M, reaction temperature =32°C).

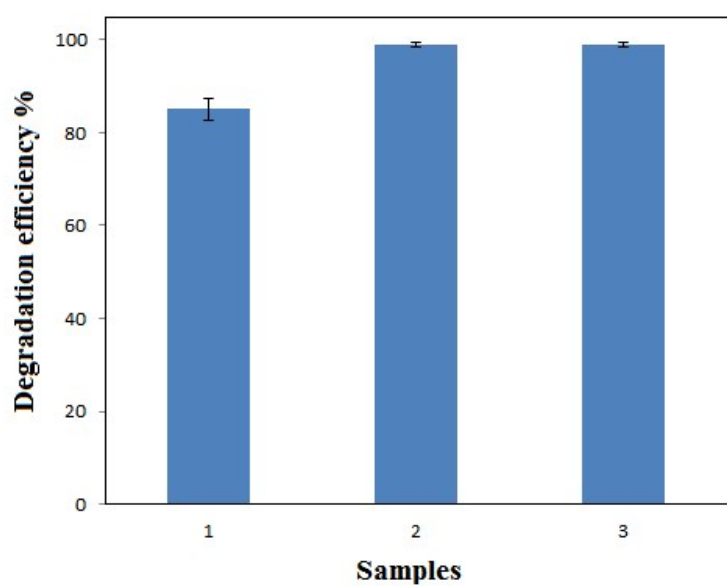

**Fig. S3.** Effect of different amounts of hydrogen peroxide on the photocatalytic degradation of MB in the presence of composite catalyst. concentration of MB= 25mg/L, amount of catalyst = 25 mg, amount of hydrogen peroxide addition, 1 mL (sample 1), 2mL (sample 2), 3 mL (sample 3), reaction temperature =32°C).

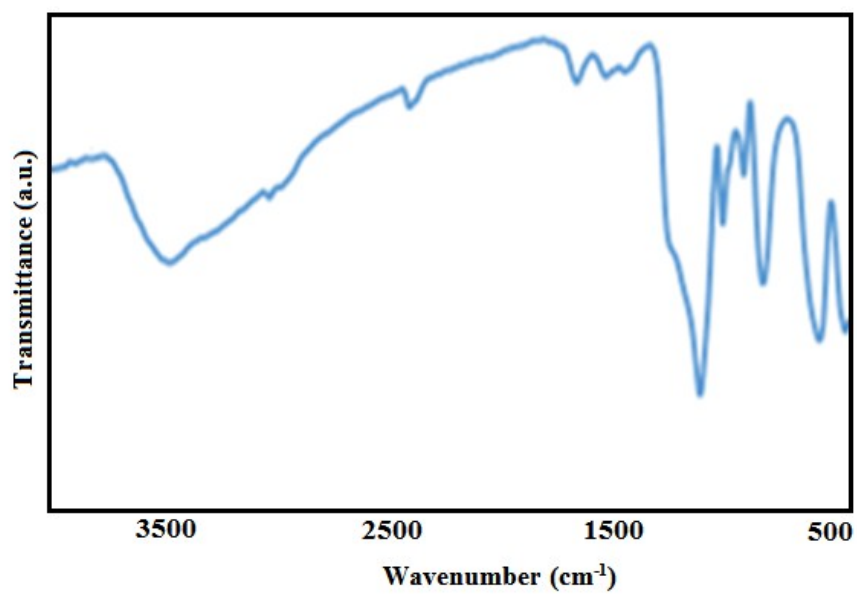

**Fig. S4.** The FT-IR spectra of recovered catalyst after three cycles of photodegradation reactions.
